# Supplementary material
Source: PubMed Central journal article supplement (PMC2329784)
Supplement: mmc1.pdf [file mmc1.pdf]

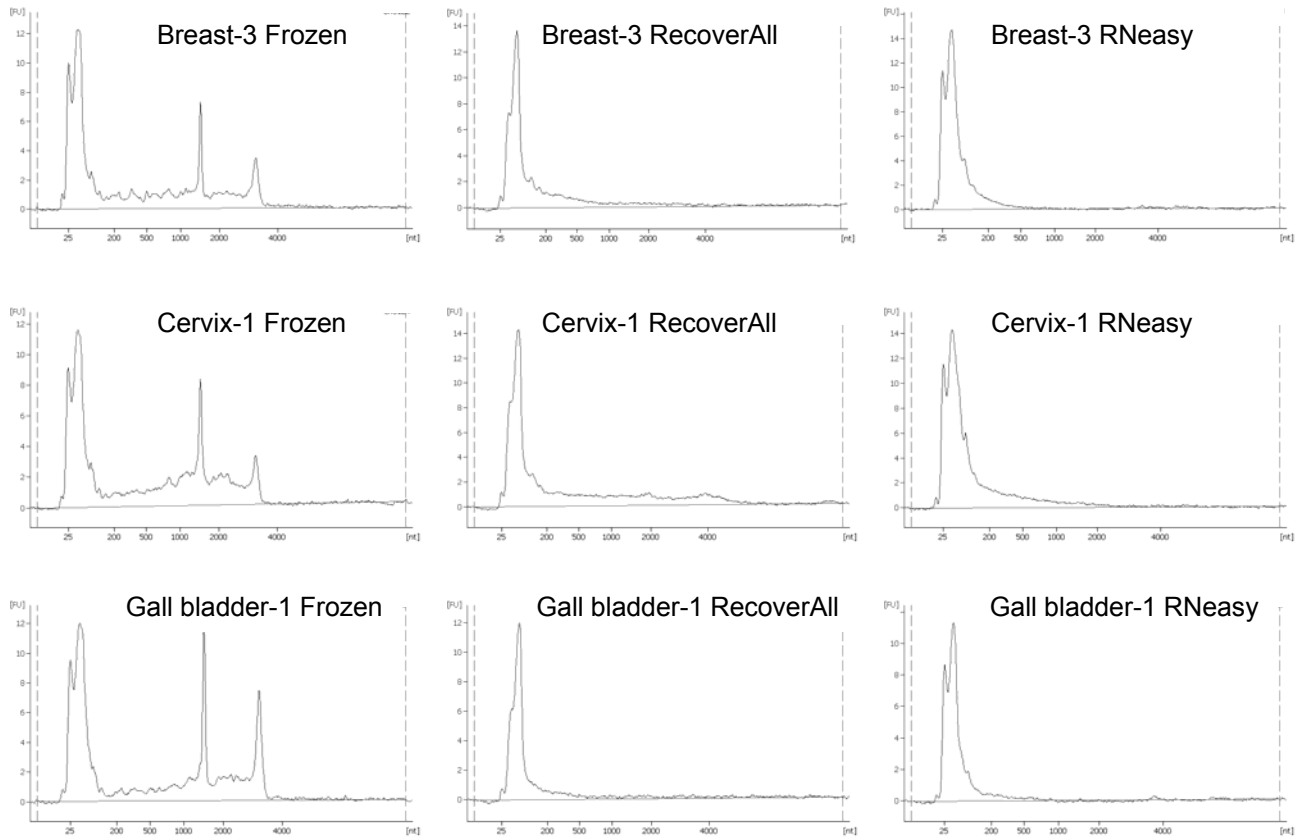

**Supplemental Figure 1.** Representative analysis of RNA isolated from matched frozen tissue and FFPE breast, cervix and gall bladder tissue using Agilent Bioanalyzer 2100 PicoChip.

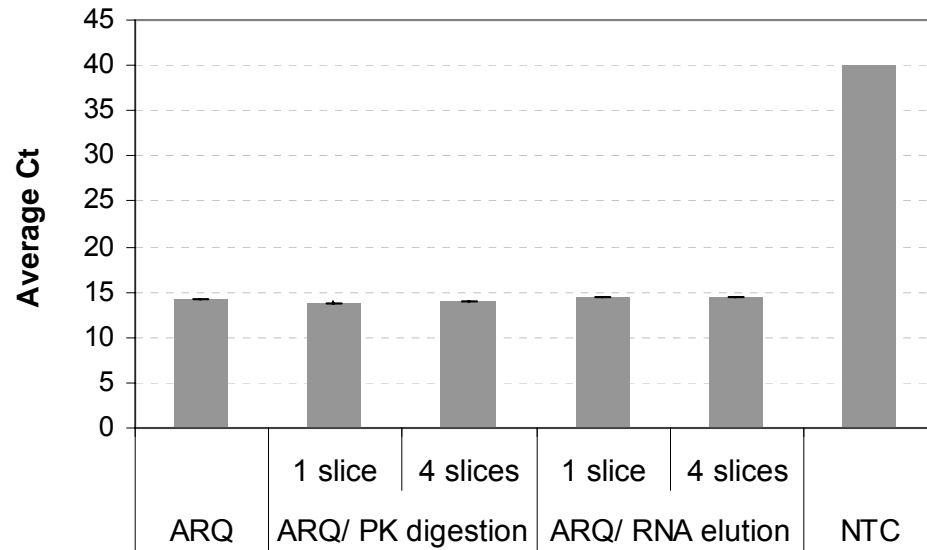

**Supplemental Figure 2.** Recovery of Armored RNA® Quant™ (ARQ) spiked-in during the RecoverAll procedure. Recovery of ARQ spiked in at the proteinase K digestion step or at the elution step during RNA isolation from one or four 20µm slices of FFPE prostate NAT was assessed by duplicate qRT-PCR using 2 µl of purified RNA. ARQ: positive control ARQ heat-lysed in nuclease free water. NTC: no template negative control.

| Tissue type       | RNA isolation     |       |           |      |        |       | Target amplification |       |         |       |        |       |        |       |      |
|-------------------|-------------------|-------|-----------|------|--------|-------|----------------------|-------|---------|-------|--------|-------|--------|-------|------|
|                   | Avg yield         |       | A260/280  |      | miR-24 |       | miR-103              |       | miR-191 |       | 18S    |       | hGUSB  |       |      |
|                   | μg                | CV,%  | Avg ratio | CV,% | Avg Ct | CV,%  | Avg Ct               | CV,%  | Avg Ct  | CV,%  | Avg Ct | CV,%  | Avg Ct | CV,%  |      |
| Operator 1        | Cervix            | 0.74  | 31.51     | 1.76 | 6.24   | 22.39 | 2.80                 | 27.49 | 0.53    | 26.80 | 1.03   | 17.34 | 2.03   | 29.12 | 0.04 |
|                   | Kidney            | 1.86  | 24.67     | 2.02 | 1.57   | 22.63 | 2.06                 | 27.42 | 3.05    | 26.45 | 1.57   | 17.16 | 0.83   | 27.51 | 0.05 |
|                   | Stomach cancer    | 2.53  | 29.55     | 1.83 | 5.04   | 23.25 | 3.94                 | 26.20 | 0.89    | 26.28 | 1.19   | 17.80 | 1.92   | 26.14 | 0.00 |
|                   | Testicular cancer | 3.58  | 17.43     | 2.03 | 0.87   | 22.34 | 1.61                 | 27.58 | 1.50    | 26.08 | 1.18   | 14.37 | 1.58   | 26.27 | 0.01 |
|                   | Uterine cancer    | 2.24  | 20.31     | 1.89 | 0.37   | 23.71 | 0.44                 | 26.01 | 0.47    | 24.81 | 0.88   | 17.95 | 0.17   | 26.35 | 0.00 |
|                   | Avg CV,%          |       | 24.69     |      | 2.82   |       | 2.17                 |       | 1.29    |       | 1.17   |       | 1.31   |       | 0.02 |
| Operator 2        | Cervix            | 0.65  | 25.17     | 3.02 | 18.16  | 23.42 | 7.06                 | 29.01 | 6.74    | 27.85 | 7.27   | 18.22 | 8.29   | 31.40 | 0.07 |
|                   | Kidney            | 2.09  | 10.98     | 2.21 | 1.28   | 22.27 | 0.61                 | 26.53 | 0.06    | 25.93 | 0.45   | 16.94 | 1.25   | 26.61 | 0.00 |
|                   | Stomach cancer    | 2.87  | 12.78     | 2.25 | 6.60   | 22.64 | 0.08                 | 25.91 | 0.01    | 26.06 | 0.45   | 17.35 | 0.89   | 26.29 | 0.00 |
|                   | Testicular cancer | 3.60  | 20.86     | 2.17 | 7.49   | 22.51 | 1.50                 | 27.66 | 0.87    | 25.88 | 0.50   | 14.66 | 0.54   | 26.62 | 0.01 |
|                   | Uterine cancer    | 2.08  | 11.0209   | 2.12 | 0.67   | 23.52 | 0.17                 | 26.09 | 0.38    | 24.58 | 0.16   | 18.24 | 0.08   | 26.37 | 0.00 |
|                   | Avg CV,%          |       | 16.16     |      | 6.84   |       | 1.88                 |       | 1.61    |       | 1.76   |       | 2.21   |       | 0.02 |
| Overall Avg CV, % |                   | 20.82 |           | 4.83 |        | 2.03  |                      | 1.45  |         | 1.47  |        | 1.76  |        | 0.02  |      |

**Supplemental Table 1.** Summary of inter-day variability data. Duplicate RNA isolations using two 20 μm slices from five different FFPE tissue blocks were carried out by two different operators on two different days using the RecoverAll procedure. qRT-PCR reactions were performed at least in duplicate for each RNA target.

| Sample ID | Embedding year | A260/280 | Yield per 20µm slice, µg | miR-24 Avg Ct | miR-103 Avg Ct | miR-191 Avg Ct | hGUSB Avg Ct | 18S Avg Ct | ARQ Avg Ct |
|-----------|----------------|----------|--------------------------|---------------|----------------|----------------|--------------|------------|------------|
| TUM-1     | 1996           | 1.97     | 4.29                     | 23.13         | 27.63          | 24.70          | 28.07        | 25.01      | 14.97      |
| NAT-1     | 1996           | 1.77     | 2.33                     | 20.71         | 26.48          | 23.54          | 27.69        | 20.53      | 14.19      |
| TUM-2     | 1996           | 1.96     | 5.04                     | 22.04         | 27.12          | 24.49          | 26.05        | 16.97      | 14.34      |
| NAT-2     | 1996           | 1.83     | 1.45                     | 21.27         | 26.33          | 23.82          | 27.02        | 15.86      | 14.05      |
| TUM-3     | 1996           | 2.00     | 3.23                     | 23.00         | 26.28          | 24.56          | 27.54        | 19.59      | 14.89      |
| NAT-3     | 1996           | 1.83     | 1.96                     | 21.75         | 27.14          | 23.96          | 27.53        | 21.95      | 14.31      |
| TUM-4     | 1996           | 2.02     | 4.35                     | 22.69         | 25.73          | 23.81          | 25.14        | 15.56      | 14.32      |
| NAT-4     | 1996           | 1.94     | 1.18                     | 21.73         | 26.56          | 24.30          | 27.45        | 18.99      | 14.01      |
| TUM-5     | 1996           | 1.98     | 1.31                     | 29.93         | 33.50          | 28.35          | 32.88        | 29.33      | 29.63      |
| NAT-5     | 1996           | 1.93     | 0.88                     | 21.85         | 26.98          | 23.91          | 26.13        | 15.66      | 14.03      |
| TUM-6     | 2003           | 1.88     | 5.89                     | 21.53         | 26.80          | 23.35          | 25.57        | 11.76      | 15.49      |
| NAT-6     | 2003           | 1.90     | 1.47                     | 23.19         | 28.10          | 23.85          | 27.29        | 14.02      | 15.63      |
| TUM-7     | 2003           | 1.88     | 2.67                     | 26.50         | 30.68          | 26.16          | 30.05        | 23.14      | 16.69      |
| NAT-7     | 2003           | 1.85     | 2.15                     | 22.55         | 27.55          | 23.78          | 28.08        | 20.14      | 14.39      |
| TUM-8     | 2003           | 1.60     | 0.89                     | 22.36         | 26.53          | 24.08          | 27.50        | 20.57      | 14.89      |
| NAT-8     | 2003           | 1.55     | 1.11                     | 20.71         | 25.31          | 22.30          | 26.50        | 18.34      | 14.31      |
| TUM-9     | 2003           | 1.91     | 1.37                     | 21.23         | 26.50          | 23.41          | 25.46        | 16.01      | 14.05      |
| NAT-9     | 2003           | 1.78     | 0.36                     | 20.60         | 26.50          | 22.67          | 24.98        | 15.37      | 14.01      |
| TUM-10    | 2003           | 1.64     | 1.05                     | 21.85         | 27.23          | 23.48          | 29.53        | 25.61      | 14.48      |
| NAT-10    | 2003           | 1.55     | 0.76                     | 22.53         | 27.71          | 24.27          | 32.13        | 23.37      | 14.74      |
| TUM-11    | 2006           | 1.75     | 1.54                     | 20.96         | 25.66          | 23.45          | 28.13        | 18.00      | 14.36      |
| NAT-11    | 2006           | 1.54     | 0.75                     | 28.11         | 33.33          | 30.64          | 39.01        | 27.93      | 14.53      |
| TUM-12    | 2006           | 1.60     | 0.87                     | 22.93         | 26.21          | 24.63          | 31.93        | 27.93      | 14.62      |
| NAT-12    | 2006           | 1.59     | 0.64                     | 23.16         | 29.63          | 25.87          | 30.76        | 24.11      | 14.29      |
| TUM-13    | 2006           | 1.74     | 1.63                     | 20.81         | 25.14          | 22.28          | 27.19        | 22.16      | 13.99      |
| NAT-13    | 2006           | 1.63     | 0.41                     | 22.77         | 28.45          | 24.22          | 28.86        | 22.37      | 14.04      |
| TUM-14    | 2006           | 1.61     | 0.84                     | 22.66         | 27.53          | 24.46          | 31.73        | 23.77      | 14.43      |
| NAT-14    | 2006           | 1.54     | 0.63                     | 23.08         | 27.54          | 25.08          | 31.47        | 24.78      | 14.33      |
| TUM-15    | 2006           | 1.52     | 1.14                     | 20.74         | 24.82          | 22.68          | 28.39        | 23.07      | 14.98      |
| NAT-15    | 2006           | 1.74     | 1.23                     | 20.17         | 26.70          | 22.84          | 25.42        | 20.33      | 14.28      |

**Supplemental Table 2.** Summary of RNA isolation and qRT-PCR data for selected miRNA, mRNA and rRNA species, as well as ARQ process control for 15 matched pairs of FFPE lung tumor and NAT isolated with the RecoverAll kit. For each block, sixteen 20mm FFPE slices were extracted in a single tube. Each target was interrogated at least in duplicate by qRT-PCR.

| Sample ID      | Tissue type/Kit | miR-24<br>Avg Ct | miR-103<br>Avg Ct | miR-191<br>Avg Ct | 18S<br>Avg Ct | hGUSB<br>Avg Ct |
|----------------|-----------------|------------------|-------------------|-------------------|---------------|-----------------|
| Breast-1       | Frozen mirVana  | 24.08            | 26.21             | 24.86             | 8.15          | 26.76           |
|                | FFPE RecoverAll | 26.18            | 28.92             | 27.38             | 12.68         | 30.15           |
|                | FFPE RNeasy     | 28.23            | 30.13             | 27.36             | 17.54         | 32.06           |
| Breast-2       | Frozen mirVana  | 24.02            | 26.14             | 25.12             | 7.50          | 26.75           |
|                | FFPE RecoverAll | 24.92            | 27.14             | 25.07             | 10.46         | 27.42           |
|                | FFPE RNeasy     | 25.30            | 27.82             | 24.94             | 14.33         | 29.51           |
| Breast-3       | Frozen mirVana  | 22.51            | 24.56             | 22.58             | 6.00          | 24.06           |
|                | FFPE RecoverAll | 25.80            | 28.25             | 26.24             | 11.86         | 28.33           |
|                | FFPE RNeasy     | 26.87            | 29.34             | 25.77             | 15.90         | 30.06           |
| Cervix-1       | Frozen mirVana  | 20.27            | 23.43             | 21.93             | 6.54          | 26.04           |
|                | FFPE RecoverAll | 24.53            | 29.13             | 24.41             | 11.35         | 28.25           |
|                | FFPE RNeasy     | 24.46            | 26.79             | 23.94             | 13.50         | 28.70           |
| Cervix-2       | Frozen mirVana  | 22.26            | 25.50             | 23.72             | 7.91          | 27.18           |
|                | FFPE RecoverAll | 23.94            | 26.79             | 25.80             | 12.23         | 28.62           |
|                | FFPE RNeasy     | 21.93            | 25.35             | 22.69             | 14.43         | 32.39           |
| Cervix-3       | Frozen mirVana  | 20.39            | 23.62             | 22.71             | 6.22          | 26.35           |
|                | FFPE RecoverAll | 23.73            | 26.37             | 24.43             | 10.78         | 27.97           |
|                | FFPE RNeasy     | 20.80            | 24.14             | 21.60             | 14.02         | 28.93           |
| Gall bladder-1 | Frozen mirVana  | 21.16            | 24.36             | 22.84             | 6.23          | 24.92           |
|                | FFPE RecoverAll | 25.39            | 28.10             | 27.69             | 12.83         | 29.98           |
|                | FFPE RNeasy     | 26.97            | 29.54             | 26.88             | 17.63         | 31.18           |
| Gall bladder-2 | Frozen mirVana  | 20.61            | 23.92             | 22.08             | 5.70          | 24.29           |
|                | FFPE RecoverAll | 24.00            | 26.69             | 24.83             | 11.82         | 28.28           |
|                | FFPE RNeasy     | 25.24            | 27.69             | 24.31             | 13.77         | 28.89           |
| Liver NAT      | FFPE RecoverAll | 25.64            | 27.27             | 26.03             | 17.36         | 28.93           |
|                | FFPE RNeasy     | 26.83            | 27.19             | 25.41             | 18.26         | 28.45           |
| Lung NAT-1     | FFPE RecoverAll | 23.28            | 25.42             | 23.98             | 16.07         | 28.15           |
|                | FFPE RNeasy     | 23.83            | 26.47             | 23.39             | 18.36         | 28.31           |
| Lung NAT-2     | FFPE RecoverAll | 24.07            | 26.50             | 24.95             | 12.79         | 27.10           |
|                | FFPE RNeasy     | 24.18            | 26.85             | 23.90             | 14.37         | 26.51           |
| Prostate NAT   | FFPE RecoverAll | 23.91            | 26.11             | 24.44             | 22.07         | 29.45           |
|                | FFPE RNeasy     | 26.54            | 27.90             | 26.57             | 21.85         | 30.88           |
| Spleen         | FFPE RecoverAll | 24.04            | 25.00             | 23.83             | 13.82         | 26.10           |
|                | FFPE RNeasy     | 25.14            | 27.39             | 24.31             | 26.77         | 31.82           |

**Supplemental Table 3.** qRT-PCR amplification results of selected miRNA, mRNA and rRNA species from paired frozen and FFPE cervix, breast and gall bladder tissues isolated with the RecoverAll or RNeasy kit. Each target was interrogated at least in duplicate.
